# Supplementary material
Source: PubMed Central journal article supplement (PMC4248861)
Supplement: JB.01907-14_zjb999093378so1.pdf [file JB.01907-14_zjb999093378so1.pdf]

## Supplemental Fig -1

### CELLO RESULTS

SeqID: unknow

Analysis Report:

| SVM                    | LOCALIZATION | RELIABILITY |
|------------------------|--------------|-------------|
| Amino Acid Comp.       | Periplasmic  | 0.262       |
| N-peptide Comp.        | Cytoplasmic  | 0.715       |
| Partitioned seq. Comp. | Cytoplasmic  | 0.387       |
| Physico-chemical Comp. | Cytoplasmic  | 0.630       |
| Neighboring seq. Comp. | Cytoplasmic  | 0.328       |

CELLO Prediction:

|               |         |
|---------------|---------|
| Cytoplasmic   | 2.299 * |
| Periplasmic   | 1.022   |
| Extracellular | 0.726   |
| OuterMembrane | 0.502   |
| InnerMembrane | 0.451   |

\*\*\*\*\*

[ [Home](#) | [Documentation](#) ]

In silico sub-cellular localization of PG2212 protein was predicted to be cytoplasmic.

Supplemental Fig -2

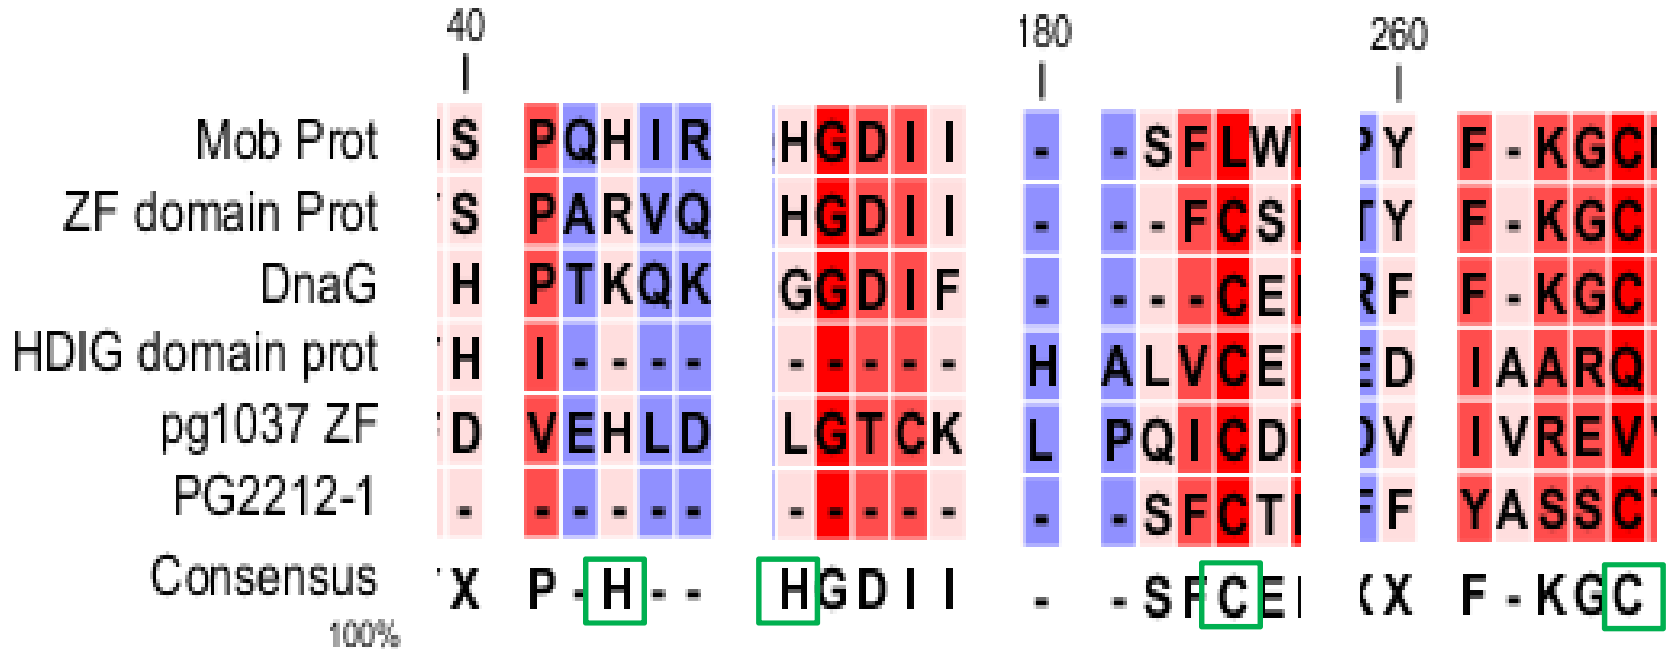

Multiple sequence alignment of *P. gingivalis* proteins containing zinc finger domains.

### Supplemental Fig -3

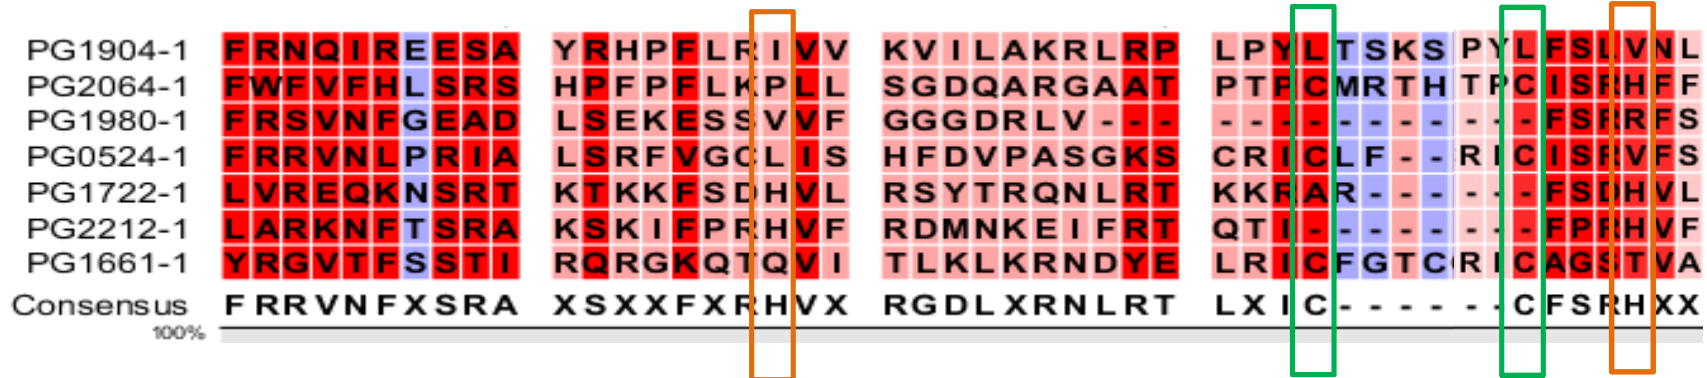

Multiple sequence alignment of 7 *P. gingivalis* proteins (PG2212, PG2064, PG1980, PG1904, PG1722, PG1661 And PG0524) showing conserved DUF 1661 domain and zinc finger target sites.
