# Supplementary material
Source: PubMed Central journal article supplement (PMC4248861)
Supplement: JB.01907-14_zjb999093378so2.pdf [file JB.01907-14_zjb999093378so2.pdf]

Supplemental table 1. Differentially expressed genes in FLL366 under anaerobic conditions

| Gene ID                           | Annotation                          | Fold(FLL366/W83) | p-value     |
|-----------------------------------|-------------------------------------|------------------|-------------|
| <b>Transposase and transposon</b> |                                     |                  |             |
| PG0008                            | ISPg5 transposase Orf2              | -1.57            | 0.000599146 |
| PG0019                            | ISPg4 transposase                   | -1.73            | 0.00188336  |
| PG0041                            | ISPg5 transposase Orf2              | -1.55            | 0.00124361  |
| PG0177                            | ISPg4, transposase                  | -1.73            | 0.00189314  |
| PG0426                            | ISPg5, transposase Orf2             | -1.58            | 0.000702206 |
| PG0458                            | ISPg5, transposase Orf2             | -1.57            | 0.000822161 |
| PG0591                            | ISPg5, transposase Orf2             | -1.59            | 0.000880705 |
| PG0819                            | integrase                           | -1.80            | 0.000168119 |
| PG0820                            | integrase                           | -1.83            | 0.00149976  |
| PG0872                            | mobilizable transposon, Xis protein | -1.55            | 0.00128814  |
| PG0943                            | ISPg5, transposase Orf2             | -1.57            | 0.000950353 |
| PG1261                            | ISPg4, transposase                  | -1.73            | 0.00171647  |
| PG1474                            | conjugative transposon protein TraO | -1.50            | 0.00156289  |
| PG1475                            | conjugative transposon protein TraN | -1.56            | 0.000122558 |
| PG1478                            | conjugative transposon protein TraK | -1.67            | 3.24E-05    |
| PG1479                            | conjugative transposon protein TraJ | -1.62            | 1.57E-05    |
| PG1481                            | conjugative transposon protein TraG | -1.59            | 5.84E-05    |
| PG1482                            | conjugative transposon protein TraF | -1.50            | 0.00161445  |
| PG1483                            | conjugative transposon protein TraE | -1.56            | 7.54E-05    |
| PG1485                            | conjugative transposon protein TraC | -1.58            | 0.000811496 |
| PG1486                            | conjugative transposon protein TraA | -1.83            | 1.87E-06    |
| PG1710                            | ISPg5, transposase Orf2             | -1.58            | 0.000814519 |
| PG2057                            | ISPg5, transposase Orf2             | -1.55            | 0.000960293 |
| <b>Transporter</b>                |                                     |                  |             |
| upregulated                       |                                     |                  |             |

|                                   |                                             |       |             |
|-----------------------------------|---------------------------------------------|-------|-------------|
| PG0782                            | MotA/TolQ/ExbB proton channel family        | 1.52  | 6.06E-06    |
| PG0946                            | ABC transporter, ATP-binding protein        | 2.04  | 1.21E-07    |
| downregulated                     |                                             |       |             |
| PG0682                            | ABC transporter, permease protein, putative | -1.67 | 7.24E-08    |
| PG0683                            | ABC transporter, permease protein, putative | -1.74 | 1.06E-06    |
| PG0684                            | ABC transporter, permease protein, putative | -1.58 | 3.75E-05    |
| PG1381                            | ABC transporter, permease protein           | -1.56 | 1.78E-05    |
| PG1446                            | MATE efflux family protein                  | -1.67 | 0.00609314  |
| PG1734                            | transporter, putative                       | -1.66 | 9.38E-05    |
| PG1836                            | nucleoside permease NupG                    | -1.54 | 0.000286242 |
| PG1946                            | ABC 3 transporter family protein            | -1.52 | 2.32E-08    |
| PG2219                            | potassium uptake protein TrkH               | -1.60 | 7.62E-08    |
| <b>transcriptional regulators</b> |                                             |       |             |
| Upregulated                       |                                             |       |             |
| PG0857                            | transcriptional regulator, putative         | 1.81  | 1.07E-05    |
| PG0860                            | transcriptional regulator, putative         | 1.81  | 1.27E-06    |
| PG0985                            | ECF subfamily RNA polymerase sigma          | 1.99  | 3.13E-07    |
| PG1181                            | TetR family transcriptional regulator       | 1.52  | 0.0812207   |
| PG1237                            | LuxR family transcriptional regulator       | 3.42  | 1.24E-07    |
| PG1240                            | TetR family transcriptional regulator       | 1.67  | 6.12E-07    |
| PG1318                            | ECF subfamily RNA polymerase sigma          | 1.68  | 2.99E-10    |
| Downregulated                     |                                             |       |             |
| PG1535                            | transcriptional regulator, putative         | -1.69 | 0.00215718  |
| PG1660                            | ECF subfamily RNA polymerase sigma          | -3.06 | 0.0607862   |
| PG2161                            | AraC family transcriptional regulator       | -1.63 | 1.56E-06    |
| <b>Chaperon</b>                   |                                             |       |             |
| PG0045                            | heat shock protein 90                       | 2.55  | 4.48E-06    |
| PG0520                            | chaperonin GroEL                            | 1.93  | 7.71E-07    |
| PG0521                            | co-chaperonin GroES                         | 3.28  | 2.55E-08    |

|        |                          |      |          |
|--------|--------------------------|------|----------|
| PG1775 | grpE protein             | 2.78 | 3.29E-06 |
| PG1776 | dnaJ protein             | 1.97 | 1.70E-05 |
| PG1208 | molecular chaperone DnaK | 2.63 | 3.27E-07 |

#### **Oxidative stress related**

|        |                                               |       |             |
|--------|-----------------------------------------------|-------|-------------|
| PG0195 | rubrerythrin                                  | -1.66 | 0.00418634  |
| PG0210 | precorrin-6x reductase/cobalamin              | -1.52 | 1.16E-07    |
| PG0548 | pyruvate ferredoxin/ferredoxin                | -1.64 | 0.000180167 |
| PG1172 | iron-sulfur cluster binding protein, putative | -1.59 | 3.90E-05    |
| PG1402 | AP endonuclease domain-containing protein     | -1.63 | 1.30E-09    |
| PG1585 | BatD protein                                  | -1.53 | 1.65E-06    |
| PG1586 | BatE protein                                  | -1.60 | 2.38E-10    |
| PG1812 | 2-ketoisovalerate ferredoxin reductase        | -1.57 | 0.000418133 |

#### **Glycosylation related**

|        |                                              |       |             |
|--------|----------------------------------------------|-------|-------------|
| PG0110 | glycosyl transferase, group 1 family protein | -1.51 | 0.0119538   |
| PG0352 | sialidase, putative                          | -1.46 | 4.09E-05    |
| PG0917 | GtrA family protein                          | -1.53 | 0.000414299 |
| PG1724 | O-sialoglycoprotein endopeptidase            | -1.51 | 5.05E-06    |
| PG1055 | thiol protease                               | -1.51 | 0.0115627   |

#### **Hypothetical proteins**

##### Upregulated

|        |                             |      |            |
|--------|-----------------------------|------|------------|
| PG0160 | hypothetical protein PG0160 | 1.65 | 2.14E-06   |
| PG0319 | hypothetical protein PG0319 | 2.24 | 1.12E-09   |
| PG0404 | hypothetical protein PG0404 | 1.5  | 4.10E-06   |
| PG0482 | hypothetical protein PG0482 | 1.83 | 9.09E-06   |
| PG0495 | hypothetical protein PG0495 | 2.39 | 0.0146996  |
| PG0554 | hypothetical protein PG0554 | 2.5  | 1.79E-06   |
| PG0565 | hypothetical protein PG0565 | 1.83 | 7.25E-07   |
| PG0574 | hypothetical protein PG0574 | 1.65 | 3.84E-12   |
| PG0612 | hypothetical protein PG0612 | 1.5  | 0.00121001 |

|        |                             |      |             |
|--------|-----------------------------|------|-------------|
| PG0659 | hypothetical protein PG0659 | 1.59 | 1.12E-05    |
| PG0686 | hypothetical protein PG0686 | 1.68 | 1.60E-06    |
| PG0779 | hypothetical protein PG0779 | 2.19 | 4.67E-09    |
| PG0780 | hypothetical protein PG0780 | 1.82 | 1.30E-08    |
| PG0786 | hypothetical protein PG0786 | 1.63 | 0.00197948  |
| PG0832 | hypothetical protein PG0832 | 1.55 | 0.00477003  |
| PG0833 | hypothetical protein PG0833 | 1.69 | 0.000727504 |
| PG0834 | hypothetical protein PG0834 | 1.73 | 7.65E-05    |
| PG0856 | hypothetical protein PG0856 | 1.56 | 1.86E-07    |
| PG0929 | hypothetical protein PG0929 | 1.72 | 7.07E-06    |
| PG0947 | hypothetical protein PG0947 | 1.79 | 1.96E-08    |
| PG0986 | hypothetical protein PG0986 | 1.89 | 3.68E-07    |
| PG0987 | hypothetical protein PG0987 | 1.83 | 1.06E-06    |
| PG1108 | hypothetical protein PG1108 | 2.13 | 1.90E-07    |
| PG1178 | hypothetical protein PG1178 | 2.82 | 0.00882465  |
| PG1179 | hypothetical protein PG1179 | 2.53 | 0.00885383  |
| PG1180 | hypothetical protein PG1180 | 1.86 | 0.0461076   |
| PG1216 | hypothetical protein PG1216 | 1.87 | 1.39E-05    |
| PG1236 | hypothetical protein PG1236 | 2.81 | 2.77E-07    |
| PG1257 | hypothetical protein PG1257 | 1.93 | 0.000287724 |
| PG1268 | hypothetical protein PG1268 | 2.4  | 2.39E-05    |
| PG1308 | hypothetical protein PG1308 | 1.61 | 5.67E-14    |
| PG1316 | hypothetical protein PG1316 | 1.84 | 6.40E-06    |
| PG1317 | hypothetical protein PG1317 | 1.53 | 3.86E-08    |
| PG1491 | hypothetical protein PG1491 | 2.1  | 0.000393547 |
| PG1492 | hypothetical protein PG1492 | 1.81 | 5.90E-05    |
| PG1625 | hypothetical protein PG1625 | 1.77 | 2.47E-06    |
| PG1659 | hypothetical protein PG1659 | 1.89 | 0.0137183   |
| PG1707 | hypothetical protein PG1707 | 1.88 | 1.77E-09    |

|               |                             |       |             |
|---------------|-----------------------------|-------|-------------|
| PG1777        | hypothetical protein PG1777 | 1.81  | 5.95E-06    |
| PG1778        | hypothetical protein PG1778 | 1.56  | 0.000106019 |
| PG1779        | hypothetical protein PG1779 | 1.79  | 5.04E-06    |
| PG1857        | hypothetical protein PG1857 | 1.69  | 0.0512235   |
| PG1889        | hypothetical protein PG1889 | 1.52  | 3.72E-07    |
| PG1988        | hypothetical protein PG1988 | 1.61  | 0.000281861 |
| PG1989        | hypothetical protein PG1989 | 1.91  | 0.000120565 |
| PG2019        | hypothetical protein PG2019 | 1.83  | 8.15E-05    |
| PG2050        | hypothetical protein PG2050 | 1.9   | 1.28E-06    |
| PG2086        | hypothetical protein PG2086 | 1.72  | 2.09E-05    |
| PG2172        | hypothetical protein PG2172 | 1.66  | 7.57E-05    |
| Downregulated |                             |       |             |
| PG0018        | hypothetical protein PG0018 | -1.72 | 1.27E-08    |
| PG0114        | hypothetical protein PG0114 | -1.58 | 3.50E-11    |
| PG0333        | hypothetical protein PG0333 | -1.57 | 2.19E-06    |
| PG0354        | hypothetical protein PG0354 | -1.62 | 0.000839459 |
| PG0374        | hypothetical protein PG0374 | -1.51 | 0.375188    |
| PG0428        | hypothetical protein PG0428 | -1.51 | 0.00172757  |
| PG0541        | hypothetical protein PG0541 | -1.58 | 8.23E-05    |
| PG0681        | hypothetical protein PG0681 | -3.01 | 8.75E-05    |
| PG0718        | hypothetical protein PG0718 | -1.55 | 0.000453533 |
| PG0867        | hypothetical protein PG0867 | -1.5  | 0.00676956  |
| PG0870        | hypothetical protein PG0870 | -1.71 | 0.000988356 |
| PG0871        | hypothetical protein PG0871 | -1.69 | 0.00256737  |
| PG1006        | hypothetical protein PG1006 | -1.75 | 1.20E-16    |
| PG1096        | hypothetical protein PG1096 | -1.53 | 4.91E-09    |
| PG1136        | hypothetical protein PG1136 | -1.87 | 8.33E-11    |
| PG1167        | hypothetical protein PG1167 | -7.78 | 2.71E-06    |
| PG1214        | hypothetical protein PG1214 | -1.64 | 6.50E-15    |

|        |                             |       |             |
|--------|-----------------------------|-------|-------------|
| PG1252 | hypothetical protein PG1252 | -1.57 | 5.49E-10    |
| PG1333 | hypothetical protein PG1333 | -1.52 | 3.66E-05    |
| PG1373 | hypothetical protein PG1373 | -1.67 | 0.00182465  |
| PG1457 | hypothetical protein PG1457 | -1.75 | 1.99E-05    |
| PG1458 | hypothetical protein PG1458 | -1.85 | 5.48E-07    |
| PG1459 | hypothetical protein PG1459 | -5.07 | 9.72E-08    |
| PG1460 | hypothetical protein PG1460 | -1.79 | 0.000491991 |
| PG1461 | hypothetical protein PG1461 | -1.7  | 0.00239706  |
| PG1477 | hypothetical protein PG1477 | -1.64 | 4.00E-05    |
| PG1487 | hypothetical protein PG1487 | -1.55 | 8.94E-05    |
| PG1488 | hypothetical protein PG1488 | -1.53 | 2.43E-05    |
| PG1489 | hypothetical protein PG1489 | -1.8  | 8.18E-05    |
| PG1494 | hypothetical protein PG1494 | -1.51 | 4.60E-08    |
| PG1507 | hypothetical protein PG1507 | -1.65 | 0.000780359 |
| PG1510 | hypothetical protein PG1510 | -1.53 | 0.0882164   |
| PG1511 | hypothetical protein PG1511 | -1.74 | 0.148118    |
| PG1534 | hypothetical protein PG1534 | -1.83 | 0.00132717  |
| PG1564 | hypothetical protein PG1564 | -1.72 | 1.59E-07    |
| PG1572 | hypothetical protein PG1572 | -1.79 | 2.27E-07    |
| PG1621 | hypothetical protein PG1621 | -1.5  | 5.98E-13    |
| PG1738 | hypothetical protein PG1738 | -1.55 | 1.45E-06    |
| PG1769 | hypothetical protein PG1769 | -1.59 | 4.34E-08    |
| PG1817 | hypothetical protein PG1817 | -1.56 | 1.69E-07    |
| PG1818 | hypothetical protein PG1818 | -1.77 | 2.59E-12    |
| PG1943 | hypothetical protein PG1943 | -1.52 | 0.00152318  |
| PG2004 | hypothetical protein PG2004 | -1.7  | 5.05E-06    |
| PG2021 | hypothetical protein PG2021 | -1.64 | 1.12E-10    |
| PG2022 | hypothetical protein PG2022 | -1.5  | 1.70E-13    |
| PG2123 | hypothetical protein PG2123 | -1.52 | 0.000204447 |

|        |                             |       |          |
|--------|-----------------------------|-------|----------|
| PG2130 | hypothetical protein PG2130 | -1.72 | 2.74E-05 |
| PG2214 | hypothetical protein PG2214 | -1.6  | 3.73E-12 |

---

Supplemental table 2. Differentially expressed genes in FLL366 under hydrogen peroxide stress conditions

| Gene ID                                 | Annotation                                                                           | Fold (FLL366/W83) | p-value     |
|-----------------------------------------|--------------------------------------------------------------------------------------|-------------------|-------------|
| <b>Transporter</b>                      |                                                                                      |                   |             |
| Downregulated                           |                                                                                      |                   |             |
| PG0209                                  | formate/nitrite transporter                                                          | -1.64             | 0.00233573  |
| PG0258                                  | ABC transporter, ATP-binding protein                                                 | -1.69             | 0.00787264  |
| PG0444                                  | OPT family oligopeptide transporter                                                  | -1.79             | 0.000133896 |
| PG0636                                  | MATE efflux family protein                                                           | -1.84             | 0.00123017  |
| PG0672                                  | iron compound ABC transporter, ATP-binding protein                                   | -1.62             | 0.00185902  |
| PG0680                                  | RND family efflux transporter MFP subunit                                            | -1.53             | 0.036998    |
| PG0682                                  | ABC transporter, permease protein, putative                                          | -1.50             | 0.0195269   |
| PG0683                                  | ABC transporter, permease protein, putative                                          | -1.75             | 0.00156825  |
| PG0714                                  | copper homeostasis protein CutC                                                      | -1.65             | 0.00832733  |
| PG1041                                  | K <sup>+</sup> -dependent Na <sup>+</sup> /Ca <sup>+</sup> exchanger related-protein | -1.69             | 0.000205883 |
| PG1734                                  | transporter, putative                                                                | -1.62             | 0.00383487  |
| Upregulated                             |                                                                                      |                   |             |
| PG0685                                  | ABC transporter, ATP-binding protein                                                 | 2.67              | 0.00274159  |
| PG0707                                  | TonB-dependent receptor, putative                                                    | 2.69              | 0.000078005 |
| PG0785                                  | tonB protein, putative                                                               | 1.58              | 0.0240424   |
| PG1408                                  | CzcD family heavy metal efflux protein                                               | 2.61              | 0.000159246 |
| PG1552                                  | TonB-dependent receptor HmuR                                                         | 4.26              | 0.000934891 |
| <b>Electron transfer oxidoreductase</b> |                                                                                      |                   |             |
| Downregulated                           |                                                                                      |                   |             |
| PG0195                                  | rubrerythrin                                                                         | -2.01             | 0.00224722  |
| PG0303                                  | ferredoxin                                                                           | -3.39             | 0.00170861  |
| PG0307                                  | SoxR-reducing system protein R <sub>sx</sub> E                                       | -2.05             | 9.39909E-06 |
| PG0475                                  | oxygen-independent coproporphyrinogen III oxidase,                                   | -1.76             | 2.77622E-05 |
| PG0674                                  | indolepyruvate oxidoreductase subunit B                                              | -2.02             | 0.00428268  |
| PG0675                                  | indolepyruvate ferredoxin oxidoreductase, alpha                                      | -2.08             | 0.000695611 |
| PG1171                                  | oxidoreductase, putative                                                             | -3.57             | 0.000741381 |
| PG1421                                  | ferredoxin, 4Fe-4S                                                                   | -3.99             | 0.000100537 |



|                        |                                                    |       |             |
|------------------------|----------------------------------------------------|-------|-------------|
| PG1812                 | 2-ketoisovalerate ferredoxin reductase             | -2.00 | 4.65917E-05 |
| PG1813                 | ferredoxin, 4Fe-4S                                 | -1.60 | 0.00290749  |
| Upregulated            |                                                    |       |             |
| PG0616                 | thioredoxin, putative                              | 2.57  | 0.000278091 |
| PG1858                 | flavodoxin FldA                                    | 4.26  | 1.95259E-05 |
| <b>Gene expression</b> |                                                    |       |             |
| Downregulated          |                                                    |       |             |
| PG0086                 | DEAD-box ATP dependent DNA helicase                | -1.54 | 0.0003318   |
| PG0095                 | DNA mismatch repair protein                        | -1.66 | 0.00542094  |
| PG1040                 | transcriptional regulator, putative                | -1.56 | 0.0016679   |
| PG1095                 | RNA methyltransferase                              | -1.59 | 0.00128252  |
| PG1940                 | elongation factor G                                | -1.62 | 0.0015362   |
| PG0205                 | peptide chain release factor 3                     | -1.67 | 0.00114104  |
| PG1941                 | 30S ribosomal protein S7                           | -1.66 | 0.01446     |
| PG1942                 | 30S ribosomal protein S12                          | -1.61 | 0.00139773  |
| PG1246                 | alanyl-tRNA synthetase                             | -1.61 | 0.000905771 |
| PG2062                 | histidyl-tRNA synthetase                           | -1.58 | 0.0323153   |
| Upregulated            |                                                    |       |             |
| PG0162                 | ECF subfamily RNA polymerase sigma factor          | 1.56  | 0.0033556   |
| PG0928                 | response regulator                                 | 2.39  | 2.58025E-05 |
| PG0985                 | ECF subfamily RNA polymerase sigma factor          | 3.67  | 0.000345515 |
| PG0997                 | transcriptional regulator, putative                | 1.59  | 0.0104686   |
| PG1181                 | TetR family transcriptional regulator              | 4.73  | 0.000090869 |
| PG1237                 | LuxR family transcriptional regulator              | 4.54  | 1.08098E-05 |
| PG1240                 | TetR family transcriptional regulator              | 2.62  | 0.000192229 |
| PG0592                 | 50S ribosomal protein L31 type B                   | 1.76  | 0.014037    |
| PG2140                 | 50S ribosomal protein L32                          | 1.80  | 0.0183416   |
| <b>Metabolism</b>      |                                                    |       |             |
| Downregulated          |                                                    |       |             |
| PG0046                 | phosphatidate cytidyltransferase                   | -1.74 | 0.000659988 |
| PG0073                 | orotidine 5'-monophosphate decarboxylase           | -1.59 | 0.00215094  |
| PG0335                 | tRNA delta(2)-isopentenylpyrophosphate transferase | -1.60 | 0.00909349  |

|             |                                                       |       |             |
|-------------|-------------------------------------------------------|-------|-------------|
| PG0429      | pyruvate synthase                                     | -2.32 | 0.000024593 |
| PG0430      | 2-oxoglutarate ferredoxin oxidoreductase subunit beta | -2.44 | 0.00141711  |
| PG0433      | tetrapyrrole methylase family protein                 | -1.55 | 0.000943561 |
| PG0446      | thiF protein                                          | -2.98 | 0.000339606 |
| PG0447      | pantothenate kinase                                   | -2.71 | 4.26893E-05 |
| PG0477      | pantoate--beta-alanine ligase                         | -1.52 | 0.00702077  |
| PG0548      | pyruvate ferredoxin/flavodoxin oxidoreductase family  | -2.78 | 0.000341035 |
| PG0603      | cytidylate kinase                                     | -1.62 | 7.05035E-05 |
| PG0637      | thiamine monophosphate kinase                         | -1.66 | 0.00113039  |
| PG0665      | beta-galactosidase                                    | -1.62 | 0.000576108 |
| PG0689      | NAD-dependent 4-hydroxybutyrate dehydrogenase         | -1.74 | 0.00621021  |
| PG0953      | deoxyuridine 5'-triphosphate nucleotidohydrolase      | -1.58 | 0.0136063   |
| PG1042      | glycogen synthase, putative                           | -2.00 | 1.81653E-05 |
| PG1065      | dihydroorotate dehydrogenase                          | -1.54 | 0.0227584   |
| PG1066      | butyrate-acetoacetate CoA-transferase, subunit A      | -1.52 | 0.000926144 |
| PG1070      | L-lysine 2,3-aminomutase                              | -1.61 | 0.00324722  |
| PG1079      | enoyl-CoA hydratase/isomerase family protein          | -1.60 | 0.0191235   |
| PG1116      | methylenetetrahydrofolate                             | -1.65 | 0.105293    |
| PG1170      | SerB family protein                                   | -1.56 | 0.00207734  |
| PG1247      | 3-dehydroquininate synthase                           | -1.62 | 0.00253527  |
| PG1289      | GDP-fucose synthetase                                 | -1.58 | 0.000795059 |
| PG1417      | fumarate hydratase class I, anaerobic                 | -1.56 | 0.000111157 |
| PG1703      | nucleoside triphosphate pyrophosphohydrolase          | -2.01 | 0.0116282   |
| PG1854      | 5-formyltetrahydrofolate cyclo-ligase family protein  | -1.54 | 0.000276109 |
| PG1887      | tRNA 2-selenouridine synthase                         | -1.53 | 0.00750552  |
| PG1809      | 2-oxoglutarate oxidoreductase, gamma subunit          | -2.42 | 0.000096881 |
| PG1810      | 2-oxoglutarate oxidoreductase, beta subunit           | -2.45 | 4.43485E-06 |
| PG2162      | lipid A disaccharide synthase                         | -1.86 | 0.000123332 |
| Upregulated |                                                       |       |             |
| PG0329      | formiminotransferase-cyclodeaminase-related protein   | 1.51  | 0.195903    |
| PG0531      | NAD synthetase                                        | 1.72  | 0.000572173 |
| PG0599      | 3,4-dihydroxy-2-butanone 4-phosphate synthase/GTP     | 1.60  | 0.0229352   |

|               |                                                   |       |             |
|---------------|---------------------------------------------------|-------|-------------|
| PG1239        | 3-oxoacyl-(acyl-carrier-protein) reductase        | 1.58  | 0.0287076   |
| PG1260        | anaerobic ribonucleoside triphosphate reductase   | 1.53  | 0.0327142   |
| PG1269        | delta-1-pyrroline-5-carboxylate dehydrogenase     | 3.27  | 0.000158733 |
| PG1271        | acetylornithine aminotransferase, putative        | 3.55  | 0.00011387  |
| PG1755        | fructose-1,6-bisphosphate aldolase                | 1.75  | 0.000758387 |
| PG1764        | 3-oxoacyl-(acyl-carrier-protein) synthase II      | 1.75  | 0.000950082 |
| PG1829        | long-chain-fatty-acid--CoA ligase, putative       | 1.61  | 0.00366884  |
| PG1856        | cytidine/deoxycytidylate deaminase family protein | 3.22  | 0.000331671 |
| PG2010        | phosphomannomutase, putative                      | 1.54  | 0.00014732  |
| <b>others</b> |                                                   |       |             |
| Downregulated |                                                   |       |             |
| PG0047        | cell division protein FtsH, putative              | -1.92 | 6.17413E-05 |
| PG0061        | yngK protein                                      | -1.61 | 0.00042613  |
| PG0062        | TPR domain-containing protein                     | -1.82 | 0.00378871  |
| PG0443        | hemagglutinin-related protein                     | -1.53 | 0.00531729  |
| PG0445        | peptidase T                                       | -2.68 | 0.000359239 |
| PG0476        | yngK protein                                      | -1.56 | 0.000555322 |
| PG0691        | NifU-related protein                              | -1.52 | 0.0118587   |
| PG0753        | protease                                          | -1.66 | 0.000675949 |
| PG0889        | M24 family peptidase                              | -1.77 | 0.0039282   |
| PG0890        | alkaline phosphatase, putative                    | -1.60 | 0.00228231  |
| PG1005        | putative lipoprotein                              | -1.54 | 0.00305533  |
| PG1173        | YkgG family protein                               | -1.96 | 0.000405895 |
| PG1392        | rod shape-determining protein RodA, putative      | -1.62 | 0.00140527  |
| PG1393        | penicillin-binding protein 2, putative            | -1.59 | 0.000733634 |
| PG1402        | AP endonuclease domain-containing protein         | -1.53 | 0.00367497  |
| PG1542        | collagenase                                       | -1.70 | 6.07353E-05 |
| PG1543        | thioesterase family protein                       | -1.59 | 0.000918435 |
| PG1545        | superoxide dismutase, Fe-Mn                       | -1.94 | 0.0132979   |
| PG1640        | DNA-damage-inducible protein F                    | -1.59 | 0.0010419   |
| PG1725        | competence/damage inducible protein CinA          | -1.66 | 0.00247067  |
| PG1803        | V-type ATP synthase subunit A                     | -1.59 | 0.000970027 |

|             |                                                     |       |             |
|-------------|-----------------------------------------------------|-------|-------------|
| PG1842      | acetyltransferase                                   | -1.62 | 0.00364978  |
| PG1947      | TPR domain-containing protein                       | -1.52 | 0.0030666   |
| PG2148      | xanthine/uracil permease family protein             | -1.76 | 0.0024196   |
| PG2159      | protoporphyrinogen oxidase                          | -1.71 | 0.00090675  |
| PG2163      | stationary phase survival protein SurE              | -1.59 | 0.00373065  |
| PG2223      | glycosyl transferase, group 2 family protein        | -1.52 | 0.00774404  |
| Upregulated |                                                     |       |             |
| PG0230      | putative transaldolase                              | 1.52  | 0.00963367  |
| PG0245      | universal stress protein                            | 1.80  | 0.0178643   |
| PG0537      | aminoacyl-histidine dipeptidase                     | 1.89  | 0.000462121 |
| PG0553      | extracellular protease, putative                    | 1.50  | 0.00575909  |
| PG0611      | putative lipoprotein                                | 2.11  | 4.24489E-05 |
| PG0982      | TPR domain-containing protein                       | 1.93  | 0.00095856  |
| PG1019      | putative lipoprotein                                | 14.88 | 4.42527E-06 |
| PG1315      | peptidyl-prolyl cis-trans isomerase SlyD, FKBP-type | 1.66  | 0.00793888  |
| PG1326      | hemagglutinin, putative                             | 2.02  | 0.0030826   |
| PG1374      | immunoreactive 47 kDa antigen PG97                  | 3.66  | 1.02083E-05 |
| PG1551      | hmuY protein                                        | 4.82  | 0.000105366 |
| PG1553      | CobN/magnesium chelatase family protein             | 4.41  | 3.18255E-05 |
| PG1765      | acyl carrier protein                                | 2.07  | 0.00084449  |
| PG1798      | immunoreactive 46 kDa antigen PG99                  | 3.07  | 0.000152786 |
| PG1870      | UbiE/COQ5 family methyltransferase                  | 4.02  | 7.26586E-05 |
| PG2032      | primosomal protein N'                               | 1.64  | 0.00824246  |

### **Hypothetical proteins**

#### Upregulated

|        |                             |      |            |
|--------|-----------------------------|------|------------|
| PG0100 | hypothetical protein PG0100 | 1.58 | 0.0210447  |
| PG0161 | hypothetical protein PG0161 | 1.85 | 0.0149102  |
| PG0215 | hypothetical protein PG0215 | 1.54 | 0.00358025 |
| PG0246 | hypothetical protein PG0246 | 1.72 | 0.00745587 |
| PG0323 | hypothetical protein PG0323 | 1.73 | 0.01337    |
| PG0340 | hypothetical protein PG0340 | 1.69 | 0.00193619 |

|        |                             |       |             |
|--------|-----------------------------|-------|-------------|
| PG0409 | hypothetical protein PG0409 | 1.72  | 0.0606269   |
| PG0495 | hypothetical protein PG0495 | 5.57  | 1.39604E-05 |
| PG0612 | hypothetical protein PG0612 | 2.01  | 7.82873E-05 |
| PG0613 | hypothetical protein PG0613 | 1.77  | 1.81037E-05 |
| PG0614 | hypothetical protein PG0614 | 1.61  | 0.00330564  |
| PG0617 | hypothetical protein PG0617 | 1.51  | 0.030067    |
| PG0626 | hypothetical protein PG0626 | 1.98  | 0.00119134  |
| PG0686 | hypothetical protein PG0686 | 2.67  | 0.000614345 |
| PG0706 | hypothetical protein PG0706 | 1.58  | 0.00110849  |
| PG0795 | hypothetical protein PG0795 | 1.53  | 0.00550054  |
| PG0854 | hypothetical protein PG0854 | 1.58  | 0.000869779 |
| PG0914 | hypothetical protein PG0914 | 2.07  | 0.00502313  |
| PG0926 | hypothetical protein PG0926 | 2.25  | 5.46577E-05 |
| PG0927 | hypothetical protein PG0927 | 2.24  | 9.97889E-05 |
| PG0986 | hypothetical protein PG0986 | 4.84  | 1.60826E-05 |
| PG0987 | hypothetical protein PG0987 | 5.40  | 1.50923E-05 |
| PG0998 | hypothetical protein PG0998 | 1.58  | 0.00611097  |
| PG0999 | hypothetical protein PG0999 | 1.59  | 0.000452405 |
| PG1002 | hypothetical protein PG1002 | 1.56  | 0.00178854  |
| PG1003 | hypothetical protein PG1003 | 1.51  | 0.00255704  |
| PG1020 | hypothetical protein PG1020 | 3.46  | 0.00142339  |
| PG1021 | hypothetical protein PG1021 | 2.19  | 0.000325709 |
| PG1022 | hypothetical protein PG1022 | 2.10  | 0.000262463 |
| PG1083 | hypothetical protein PG1083 | 1.55  | 0.00480999  |
| PG1108 | hypothetical protein PG1108 | 1.61  | 0.00406516  |
| PG1178 | hypothetical protein PG1178 | 9.23  | 1.61532E-05 |
| PG1179 | hypothetical protein PG1179 | 11.44 | 4.75679E-05 |
| PG1180 | hypothetical protein PG1180 | 11.06 | 1.53054E-05 |
| PG1236 | hypothetical protein PG1236 | 4.09  | 1.4261E-06  |
| PG1250 | hypothetical protein PG1250 | 1.67  | 0.00806457  |
| PG1266 | hypothetical protein PG1266 | 1.50  | 0.0438018   |
| PG1268 | hypothetical protein PG1268 | 3.77  | 0.000275612 |

|               |                             |       |             |
|---------------|-----------------------------|-------|-------------|
| PG1270        | hypothetical protein PG1270 | 3.47  | 6.95924E-05 |
| PG1291        | hypothetical protein PG1291 | 1.52  | 0.00823727  |
| PG1316        | hypothetical protein PG1316 | 1.52  | 0.0250917   |
| PG1335        | hypothetical protein PG1335 | 1.52  | 0.00168363  |
| PG1375        | hypothetical protein PG1375 | 2.45  | 0.00217063  |
| PG1465        | hypothetical protein PG1465 | 1.68  | 0.0320402   |
| PG1466        | hypothetical protein PG1466 | 2.02  | 0.00522304  |
| PG1519        | hypothetical protein PG1519 | 1.53  | 0.0447752   |
| PG1530        | hypothetical protein PG1530 | 1.63  | 0.00904559  |
| PG1554        | hypothetical protein PG1554 | 2.88  | 0.000547691 |
| PG1555        | hypothetical protein PG1555 | 2.18  | 0.00124371  |
| PG1625        | hypothetical protein PG1625 | 4.73  | 2.63123E-06 |
| PG1626        | hypothetical protein PG1626 | 2.87  | 0.000168293 |
| PG1659        | hypothetical protein PG1659 | 1.76  | 0.00955792  |
| PG1684        | hypothetical protein PG1684 | 1.70  | 0.0268454   |
| PG1770        | hypothetical protein PG1770 | 1.60  | 0.089048    |
| PG1825        | hypothetical protein PG1825 | 1.58  | 0.00242489  |
| PG1826        | hypothetical protein PG1826 | 1.56  | 0.00147057  |
| PG1857        | hypothetical protein PG1857 | 5.19  | 0.000125453 |
| PG1869        | hypothetical protein PG1869 | 2.14  | 0.00244277  |
| PG2049        | hypothetical protein PG2049 | 1.52  | 0.0182126   |
| PG2076        | hypothetical protein PG2076 | 1.58  | 0.017771    |
| PG2139        | hypothetical protein PG2139 | 1.66  | 0.00527676  |
| PG2227        | hypothetical protein PG2227 | 1.50  | 0.0666141   |
| Downregulated |                             |       |             |
| PG0060        | hypothetical protein PG0060 | -1.60 | 0.00146818  |
| PG0069        | hypothetical protein PG0069 | -1.51 | 0.000699824 |
| PG0082        | hypothetical protein PG0082 | -1.89 | 0.00118888  |
| PG0083        | hypothetical protein PG0083 | -1.55 | 0.000125423 |
| PG0132        | hypothetical protein PG0132 | -1.82 | 0.0607275   |
| PG0133        | hypothetical protein PG0133 | -1.58 | 0.00574911  |
| PG0224        | hypothetical protein PG0224 | -1.87 | 0.000568787 |

|        |                             |       |             |
|--------|-----------------------------|-------|-------------|
| PG0259 | hypothetical protein PG0259 | -1.61 | 0.00442011  |
| PG0302 | hypothetical protein PG0302 | -1.57 | 0.0023141   |
| PG0431 | hypothetical protein PG0431 | -1.69 | 0.0491074   |
| PG0547 | hypothetical protein PG0547 | -1.97 | 0.000429843 |
| PG0728 | hypothetical protein PG0728 | -1.53 | 0.000149913 |
| PG0844 | hypothetical protein PG0844 | -1.52 | 0.0692883   |
| PG1067 | hypothetical protein PG1067 | -1.56 | 0.000603581 |
| PG1068 | hypothetical protein PG1068 | -1.55 | 0.00610607  |
| PG1071 | hypothetical protein PG1071 | -1.51 | 0.000768198 |
| PG1214 | hypothetical protein PG1214 | -2.14 | 0.00120988  |
| PG1429 | hypothetical protein PG1429 | -1.51 | 0.107265    |
| PG1546 | hypothetical protein PG1546 | -1.87 | 0.0391424   |
| PG1547 | hypothetical protein PG1547 | -1.55 | 0.015208    |
| PG1639 | hypothetical protein PG1639 | -1.65 | 0.00080388  |
| PG1738 | hypothetical protein PG1738 | -1.85 | 0.00619086  |
| PG1778 | hypothetical protein PG1778 | -1.51 | 0.0161869   |
| PG1802 | hypothetical protein PG1802 | -1.58 | 0.0385504   |
| PG1811 | hypothetical protein PG1811 | -2.43 | 1.57401E-05 |
| PG1846 | hypothetical protein PG1846 | -1.53 | 0.0079153   |
| PG1977 | hypothetical protein PG1977 | -1.52 | 0.0262942   |
| PG2021 | hypothetical protein PG2021 | -1.57 | 0.00271746  |
| PG2079 | hypothetical protein PG2079 | -1.56 | 0.00413569  |
| PG2126 | hypothetical protein PG2126 | -1.56 | 0.000765046 |

---
